# Supplementary material for: Fraxetin Inhibits the Proliferation and Metastasis of Glioma Cells by Inactivating JAK2/STAT3 Signaling
Source: Hindawi journal article supplement (doi:10.1155/2021/5540139), 2021-04-16

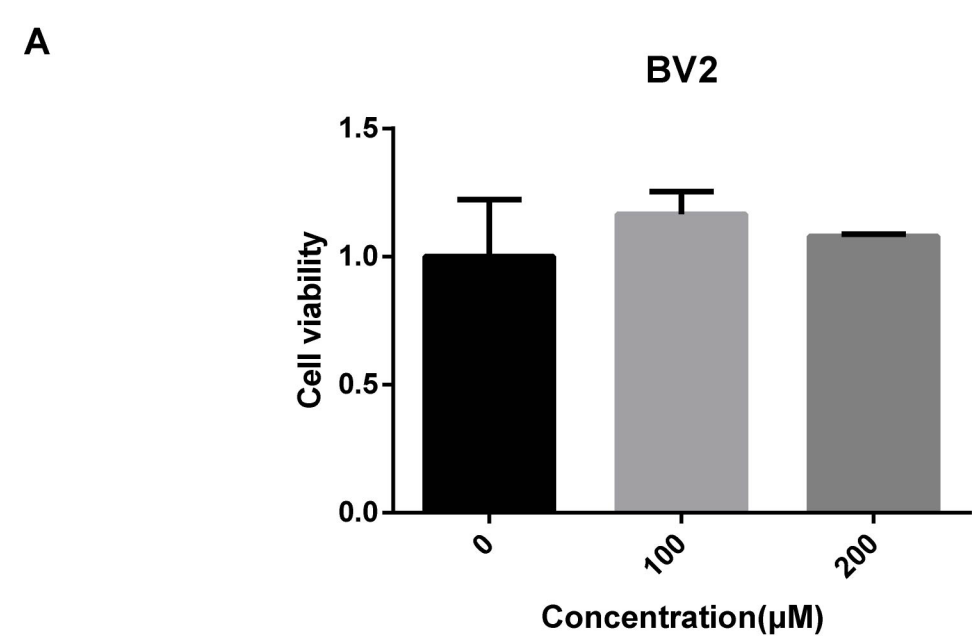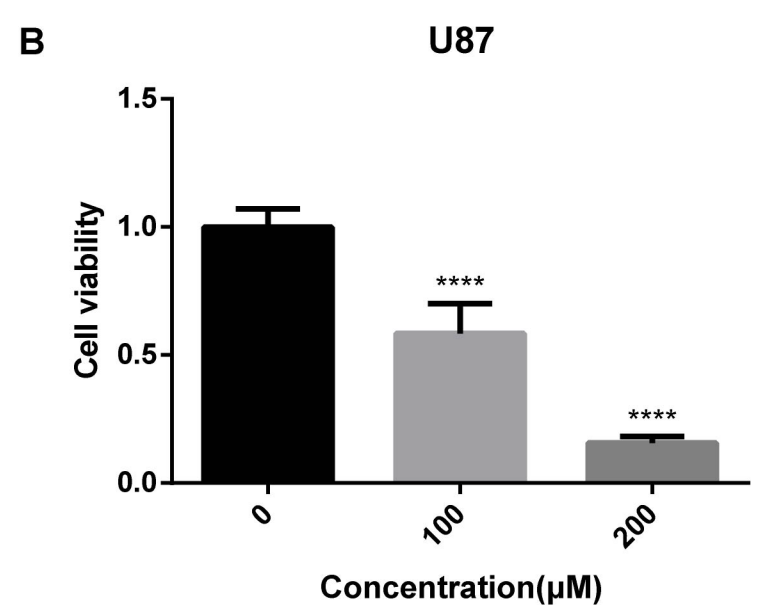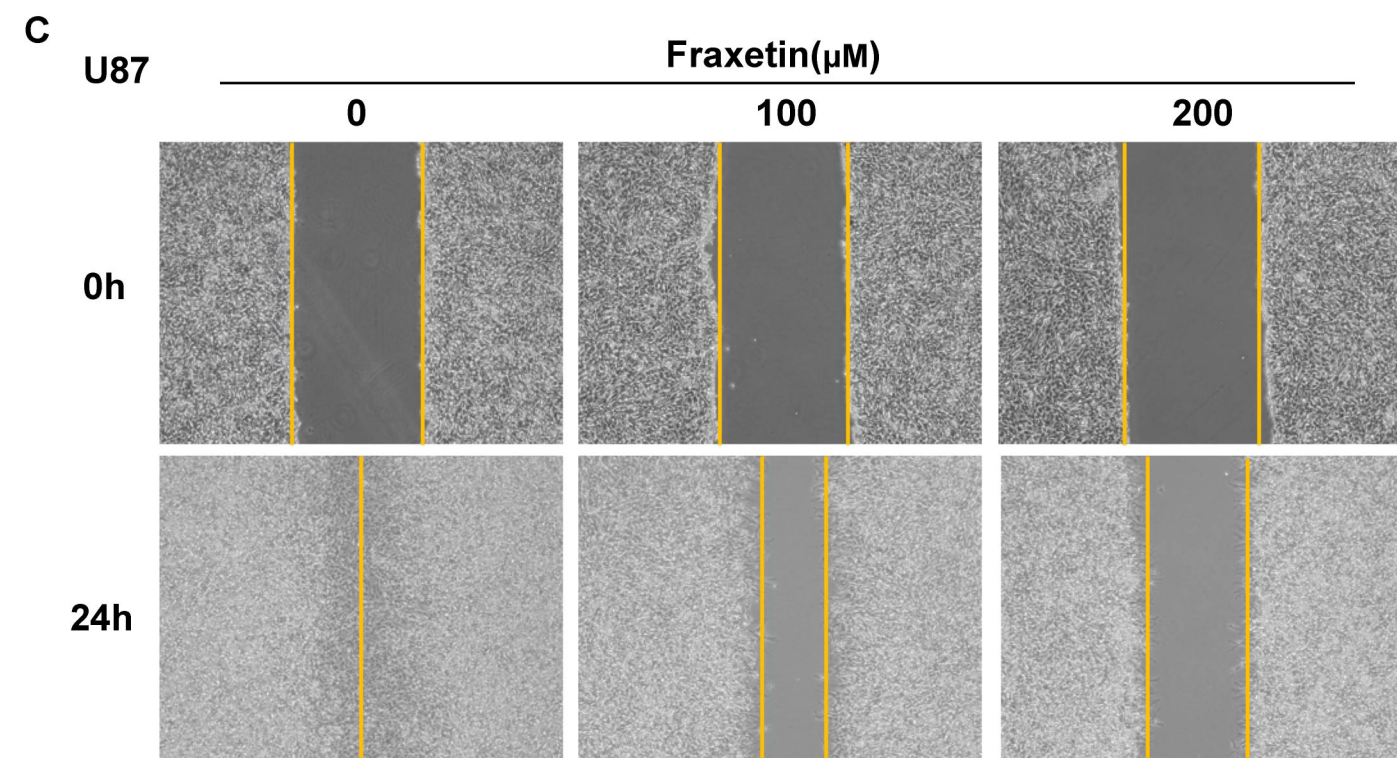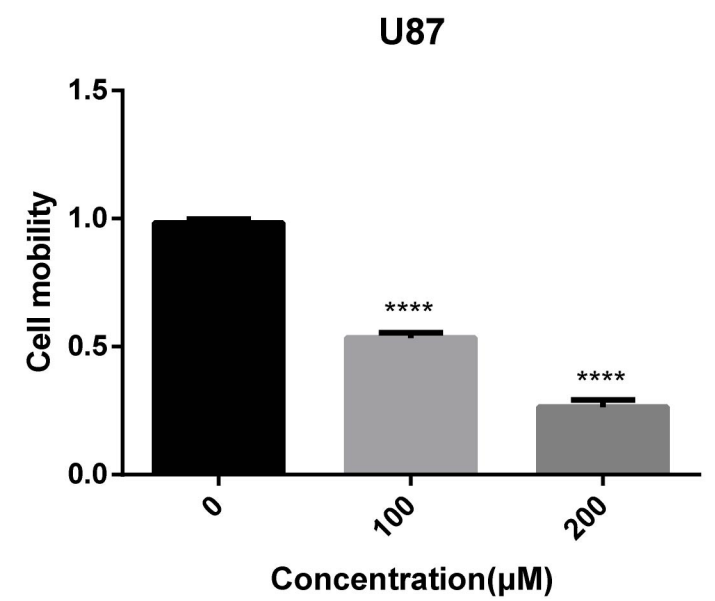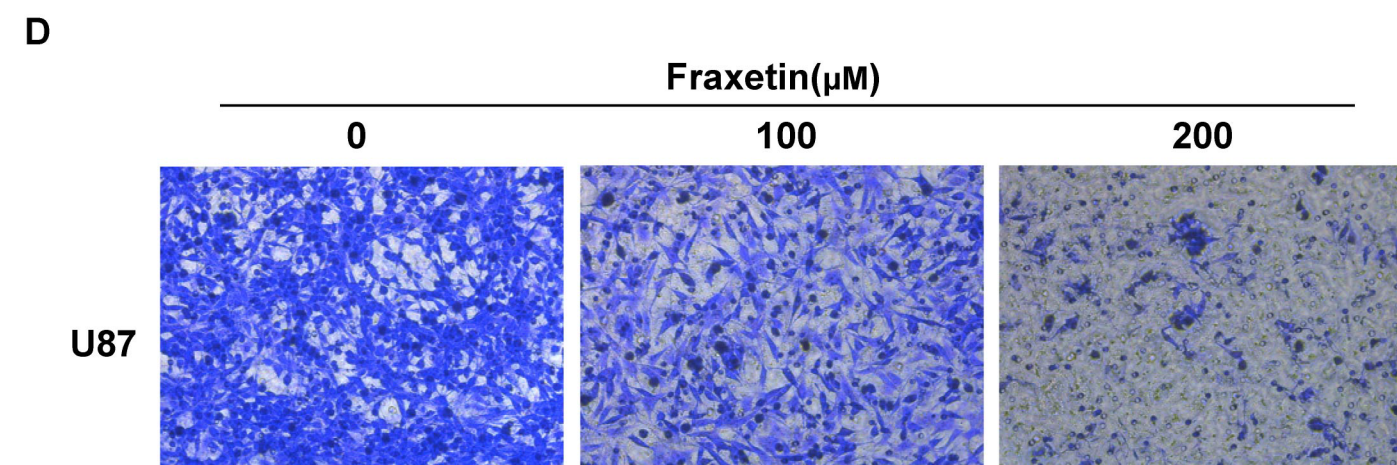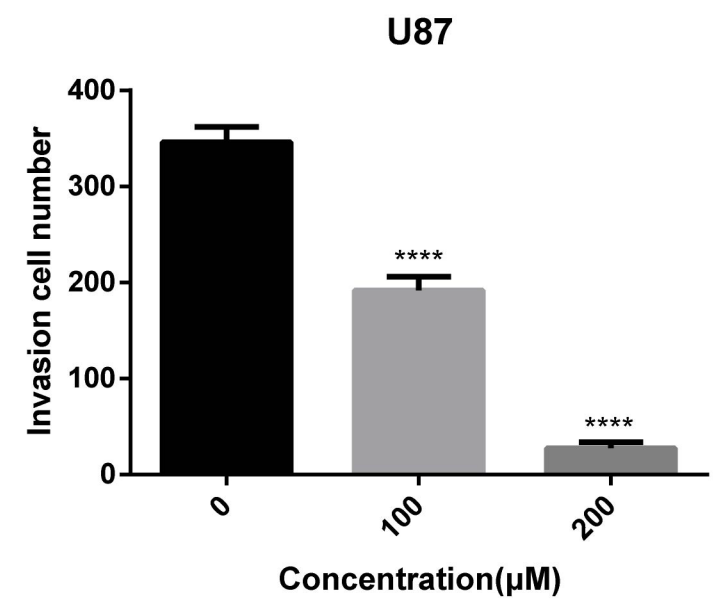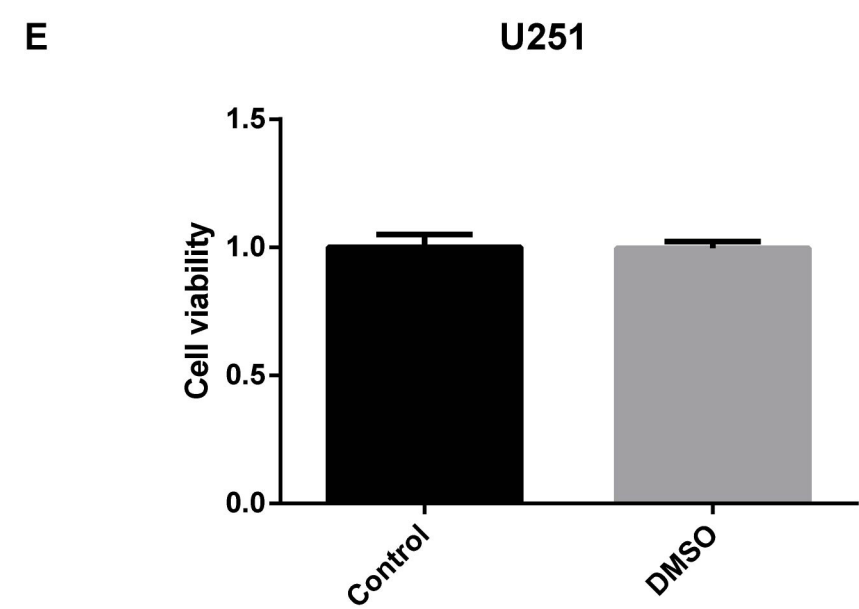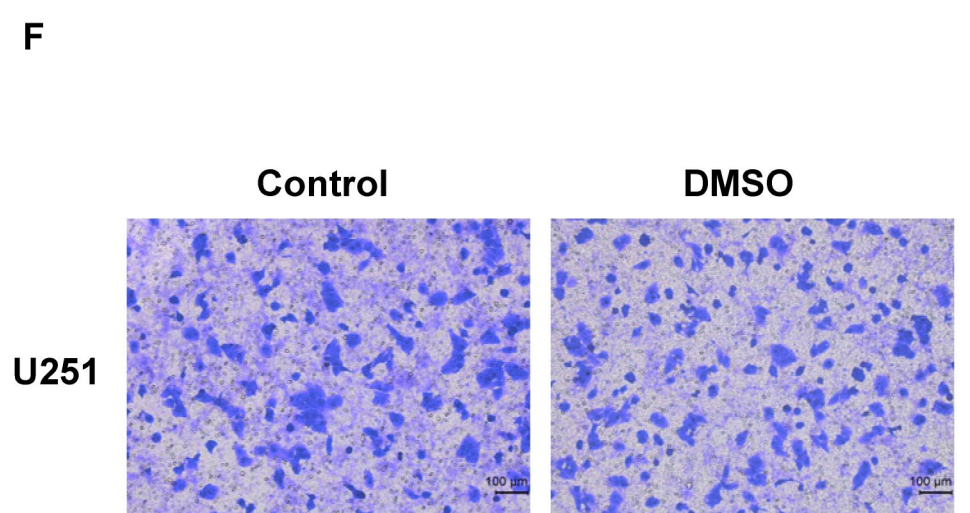

Supplement: f1 [file 5540139.f1.pdf]
